# Supplementary material for: Numerical Modelling of Moisture Loss during Controlled Drying of Marine Archaeological Wood
Source: MDPI journal article supplement (doi:10.3390/f12121662), 2021-11-30

**Table S1.** Location of all core samples.

| Core code | Side      | Deck  | Location                        | Total MC% measurements |
|-----------|-----------|-------|---------------------------------|------------------------|
| S1        | Starboard | N/A   | Stern end - low                 | 18                     |
| S2        | Starboard | N/A   | Stern end - high                | 21                     |
| S3        | Starboard | N/A   | Centre - low                    | 20                     |
| S4        | Starboard | N/A   | Centre - high                   | 17                     |
| S5        | Starboard | N/A   | Bow end - low                   | 18                     |
| S6        | Starboard | N/A   | Bow end - high                  | 20                     |
| H1        | Port      | Hold  | Internal plank - Stern end      | 20                     |
| H2        | Port      | Hold  | Internal plank - Centre         | 17                     |
| H3        | Port      | Hold  | Internal plank - Bow end        | 21                     |
| H4        | Port      | Hold  | External plank - Stern end      | 15                     |
| H5        | Port      | Hold  | External plank - Centre         | 15                     |
| H6        | Port      | Hold  | External plank - Bow end        | 15                     |
| H7        | Port      | Hold  | Beam - Stern end                | 4                      |
| H8        | Port      | Hold  | Beam - Centre                   | 4                      |
| H9        | Port      | Hold  | Beam - Bow end                  | 4                      |
| H10       | Port      | Hold  | Keelson                         | 3                      |
| O7        | Port      | Orlop | Internal side plank - Stern end | 14                     |
| O8        | Port      | Orlop | Internal side plank - Centre    | 14                     |
| O9        | Port      | Orlop | Internal side plank - Bow end   | 15                     |
| O10       | Port      | Orlop | Knee - Stern end                | 3                      |
| O11       | Port      | Orlop | Knee - Centre                   | 3                      |
| O12       | Port      | Orlop | Knee - Bow end                  | 3                      |
| M1        | Port      | Main  | Deck beam - Stern end           | 4                      |
| M2        | Port      | Main  | Deck beam - Centre              | 4                      |
| M3        | Port      | Main  | Deck beam - Bow end             | 4                      |
| M4        | Port      | Main  | Plank - Stern end               | 4                      |
| M5        | Port      | Main  | Plank - Centre                  | 4                      |
| M6        | Port      | Main  | Plank - Bow end                 | 4                      |
| M7        | Port      | Main  | Internal side plank - Stern end | 18                     |
| M8        | Port      | Main  | Internal side plank - Centre    | 19                     |
| M9        | Port      | Main  | Internal side plank - Bow end   | 17                     |
| M10       | Port      | Main  | Knee - Stern end                | 4                      |
| M11       | Port      | Main  |                                 | 4                      |
| M12       | Port      | Main  |                                 | 4                      |
| U1        | Port      | Upper | Beam - Stern end                | 3                      |
| U2        | Port      | Upper | Beam - Bow end                  | 3                      |
| U3        | Port      | Upper | Plank - Stern end               | 3                      |
| U4        | Port      | Upper | Plank - Bow end                 | 3                      |

### *Algorithm for producing dynamic simulation of drying process*

The following pseudocode block summarises the computational approach to using empirical moisture content data for producing a best-fit simulation of the *Mary Rose* drying process.

Pseudo-code description of *Mary Rose* moisture content modelling

**for all** depths  $d = 0$  to 70 mm:

**group** moisture content sample data  $M$  from all ship locations at depth  $d$

**fit** inverse exponential curve  $\tilde{M}(t) = ae^{-bt} + c$  to moisture content values  $M$  from depth  $d$  using data from time  $t = 0$  to 1092 days

**group** moisture content sample data  $M$  from all ship locations at depth  $d+1$

**fit** inverse exponential curve  $\tilde{M}(t) = ae^{-bt} + c$  to moisture content values  $M$  from depth  $d+1$  using data from time  $t = 0$  to 1092 days

**for all** times  $t = 0$  to 1092 days:

**linearly interpolate** moisture content estimates  $\tilde{M}$  from depth  $d$  to  $d+1$

*Figure S1—Dynamic drying simulation*

In addition to being displayed statically in the main text, the change in *Mary Rose* moisture content over time can also be viewed in a video format. Here, while the horizontal axis still describes simulated sample depth, there is no vertical axis describing time; instead, playing the video progresses the simulation from the start of drying until the end. Drying is still apparent by a transition from dark blue to white, first at the surface but then steadily deeper in the simulated sample. As in the main text, the color bar to the right shows how the varying colors describe moisture content. In top left, time is tracked as simulation proceeds.

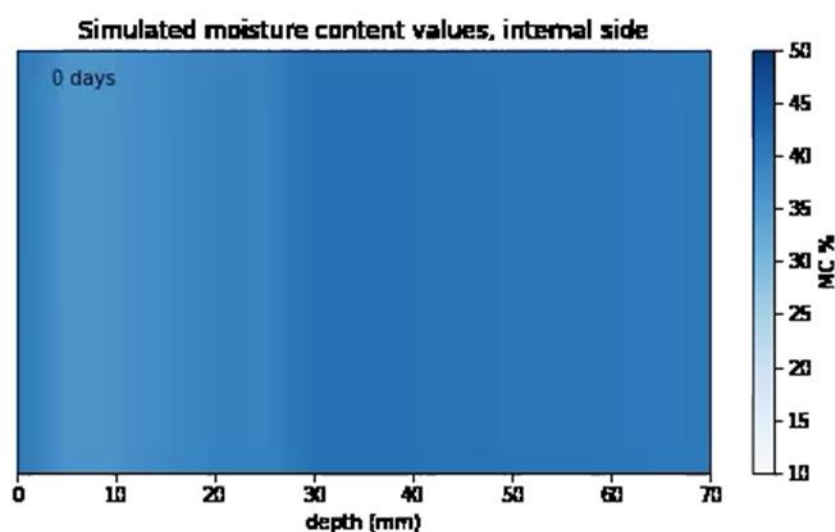

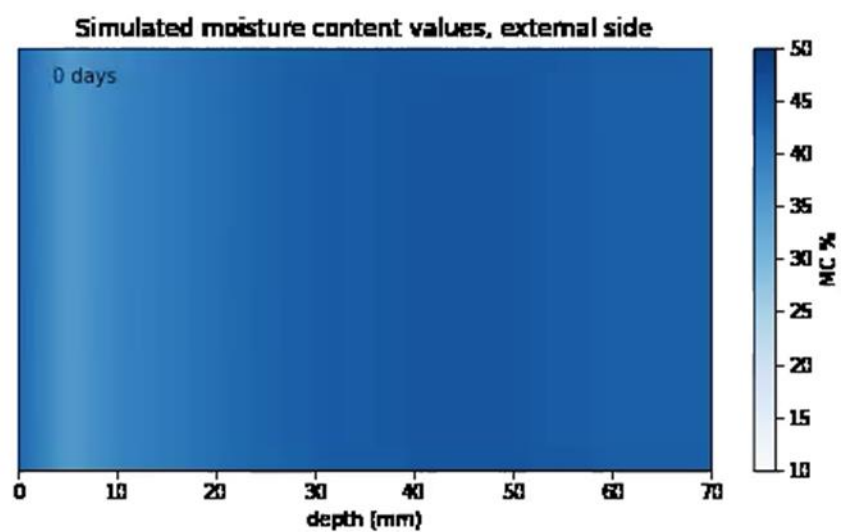

Supplement: s1 [file s1]
